# Supplementary material
Source: Springer Nature journal article supplement (https://www.springermedizin.de/resource/supplementary/12943_2012_1092_MOESM6_ESM.pdf/9552468)

**A**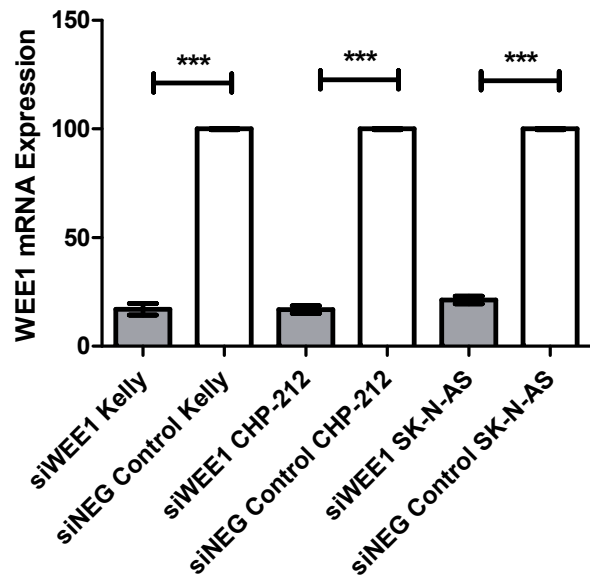**B**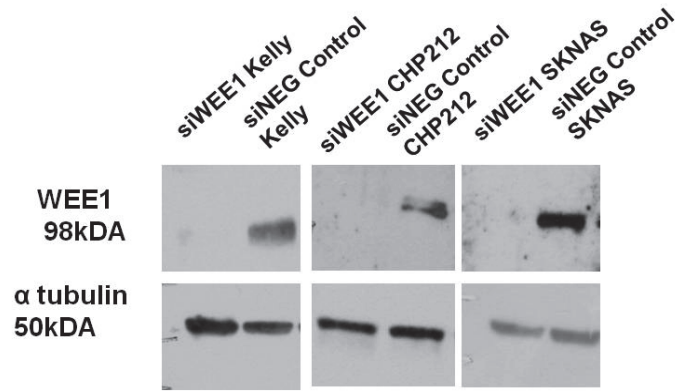

Supplement: MOESM6 [file 9552468]
